# Supplementary material for: The Dual-Edged Role of Vegetation in Evaluating Landslide Susceptibility: Evidence from Watershed-Scale and Site-Specific Analyses
Source: Copernicus journal article supplement (doi:10.5194/egusphere-2025-3004), 2025-09-09
Supplement: Supplementary file 1 [file egusphere-2025-3004-supplement.pdf]

1           **The Dual-Edged Role of Vegetation in Evaluating Landslide**  
2           **Susceptibility: Evidence from Watershed-Scale and Site-Specific**  
3           **Analyses**

4   **Songtang He<sup>a, c\*</sup>, Zhenhong Shen<sup>e</sup>, Jeffrey Neal<sup>c</sup>, Zongji Yang<sup>a</sup>, Jiangang Chen<sup>a</sup>,**  
5   **Daojie Wang<sup>a</sup>, Yujing Yang<sup>a,b</sup>, Peng Zhao<sup>a,b</sup>, Xudong Hu<sup>d</sup>, Yongming Lin<sup>e</sup>,**  
6   **Youtong Rong<sup>c</sup>, Yanchen Zheng<sup>f</sup>, Xiaoli Su<sup>c</sup>, Yong Kong<sup>g</sup>**

7   <sup>a</sup>Key Laboratory of Mountain Hazards and Engineering Resilience, Institute of  
8   Mountain Hazards and Environment, Chinese Academy of Sciences, 610213, Chengdu,  
9   China

10   <sup>b</sup>University of Chinese Academy of Sciences, 101408, Beijing, China

11   <sup>c</sup>School of Geographical Sciences, University of Bristol, BS8 1SS, Bristol, UK

12   <sup>d</sup>College of Civil Engineering and Architecture, China Three Gorges University,  
13   443002, Yichang, China

14   <sup>e</sup>College of JunCao Science and Ecology, Fujian Agriculture and Forestry University,  
15   China, 350002, Fuzhou, China

16   <sup>f</sup>School of Civil, Aerospace, and Design Engineering, University of Bristol, BS8 1TR,  
17   Bristol, UK

18   <sup>g</sup>Department of Civil and Environmental Engineering, The Hong Kong Polytechnic  
19   University, Kowloon, Hong Kong SAR, China.

20

21   \*Corresponding author. E-mail: hest@imde.ac.cn

22   Address: No.189, QunXianNan Street, TianFu New Area, Chengdu, Sichuan, China.

23   **Contents of this file**

24   **1. Tables S1 to S5**

25   **2. Texts S1 to S2**

26   **3. Figure S1**

27

28 **Supplementary Tables**

29 **Table S1: Zonal statistical results of landslide influencing factors**

| Factor                   | Classification        | Evaluation level | Area of classification (km <sup>2</sup> ) | Number of Landslides (count) | Landslide point density (points/km <sup>2</sup> ) |
|--------------------------|-----------------------|------------------|-------------------------------------------|------------------------------|---------------------------------------------------|
| Elevation (m)            | ≤1000                 | 9                | 55.61                                     | 43                           | 0.77                                              |
|                          | (1000–1500]           | 7                | 122.56                                    | 66                           | 0.54                                              |
|                          | (1500–2500]           | 5                | 357.09                                    | 112                          | 0.31                                              |
|                          | (2500–3000]           | 3                | 63.73                                     | 6                            | 0.09                                              |
|                          | > 3000                | 1                | 5.59                                      | 0                            | 0.00                                              |
| Slope (°)                | ≤10                   | 1                | 40.11                                     | 19                           | 0.47                                              |
|                          | (10–20]               | 3                | 102.18                                    | 53                           | 0.52                                              |
|                          | (20–35]               | 5                | 266.52                                    | 95                           | 0.36                                              |
|                          | (35–45]               | 7                | 140.18                                    | 47                           | 0.34                                              |
|                          | > 45                  | 9                | 51.71                                     | 13                           | 0.25                                              |
| Aspect                   | Flat                  | 1                | 0.85                                      | 0                            | 0.00                                              |
|                          | North                 | 5                | 57.74                                     | 32                           | 0.55                                              |
|                          | Northeast             | 5                | 70.98                                     | 18                           | 0.25                                              |
|                          | East                  | 5                | 79.92                                     | 19                           | 0.24                                              |
|                          | Southeast             | 5                | 90.09                                     | 24                           | 0.27                                              |
|                          | South                 | 3                | 75.86                                     | 28                           | 0.37                                              |
|                          | Southwest             | 3                | 83.83                                     | 50                           | 0.60                                              |
|                          | West                  | 3                | 77.15                                     | 26                           | 0.34                                              |
|                          | Northwest             | 3                | 64.28                                     | 30                           | 0.47                                              |
| Rainfall (mm)            | ≤1000                 | 3                | 110.5                                     | 0                            | 0.00                                              |
|                          | (1000–1100]           | 5                | 248.13                                    | 16                           | 0.06                                              |
|                          | (1100–1200]           | 6                | 117.63                                    | 83                           | 0.71                                              |
|                          | (1200–1300]           | 7                | 68.7                                      | 45                           | 0.66                                              |
|                          | (1300–1400]           | 8                | 39.3                                      | 39                           | 0.99                                              |
|                          | > 1400                | 9                | 20.29                                     | 44                           | 2.17                                              |
| Lithology                | Acidic plutonic       | 3                | 6.97                                      | 6                            | 0.86                                              |
|                          | Carbonate sedimentary | 5                | 84.97                                     | 18                           | 0.21                                              |
|                          | Pyroclastics          | 1                | 50.06                                     | 13                           | 0.26                                              |
|                          | Mixed sedimentary     | 7                | 315.17                                    | 103                          | 0.33                                              |
|                          | Intermediate volcanic | 9                | 147.99                                    | 87                           | 0.59                                              |
| Distance from fault (km) | ≤3                    | 9                | 63.17                                     | 44                           | 0.70                                              |
|                          | (3–6]                 | 7                | 83.41                                     | 56                           | 0.67                                              |
|                          | (6–9]                 | 6                | 98.47                                     | 33                           | 0.34                                              |

|                                      |             |   |        |     |      |
|--------------------------------------|-------------|---|--------|-----|------|
|                                      | (9–12]      | 5 | 99.74  | 24  | 0.24 |
|                                      | (12–15]     | 3 | 102.09 | 27  | 0.26 |
|                                      | > 15        | 1 | 157.7  | 43  | 0.27 |
| Distance<br>from road<br>(m)         | ≤200        | 9 | 81.32  | 30  | 0.37 |
|                                      | (200–400]   | 7 | 51.65  | 24  | 0.46 |
|                                      | (400–,600]  | 5 | 42.71  | 21  | 0.49 |
|                                      | (600–800]   | 3 | 37.72  | 19  | 0.50 |
|                                      | > 800       | 1 | 391.16 | 133 | 0.34 |
| Distance<br>from river<br>(m)        | ≤500        | 9 | 103.34 | 34  | 0.33 |
|                                      | (500–1000]  | 7 | 90.89  | 36  | 0.40 |
|                                      | (1000–1500] | 5 | 84.43  | 34  | 0.40 |
|                                      | (1500–2500] | 3 | 138.74 | 57  | 0.41 |
|                                      | > 2500      | 1 | 187.15 | 66  | 0.35 |
| NDVI                                 | ≤ 0.2       | 1 | 10.28  | 1   | 0.10 |
|                                      | (0.2–0.4]   | 2 | 81.4   | 25  | 0.31 |
|                                      | (0.4–0.6]   | 4 | 184.13 | 70  | 0.38 |
|                                      | (0.6–0.8]   | 6 | 319.13 | 126 | 0.39 |
|                                      | > 0.8       | 8 | 9.15   | 5   | 0.55 |
| Wind<br>speed<br>(ms <sup>-1</sup> ) | ≤1.5        | 3 | 23.68  | 17  | 0.72 |
|                                      | (1.5–2]     | 5 | 74.25  | 49  | 0.66 |
|                                      | (2–3]       | 7 | 389.46 | 134 | 0.34 |
|                                      | > 3         | 9 | 117.17 | 27  | 0.23 |

**Table S2: Results of consistency test of AHP judgment matrix**

|     | $\lambda_{max}$ | CI   | RI   | CR   | Test result          |
|-----|-----------------|------|------|------|----------------------|
| I   | 7.59            | 0.10 | 1.34 | 0.07 | Satisfy the standard |
| II  | 8.83            | 0.12 | 1.40 | 0.09 |                      |
| III | 8.65            | 0.09 | 1.40 | 0.07 |                      |
| IV  | 9.91            | 0.11 | 1.45 | 0.08 |                      |
| V   | 10.96           | 0.11 | 1.49 | 0.07 |                      |

**Table S3: Weight results obtained by AHP**

| Factor              | Feature vector |      |      |      |      | Weight value (%) |       |       |       |       |
|---------------------|----------------|------|------|------|------|------------------|-------|-------|-------|-------|
|                     | I              | II   | III  | IV   | V    | I                | II    | III   | IV    | V     |
| Elevation           | 0.61           | 0.56 | 0.55 | 0.51 | 0.59 | 8.65             | 6.93  | 5.72  | 6.93  | 5.92  |
| Slope               | 1.59           | 1.28 | 1.38 | 1.43 | 1.46 | 22.72            | 16.01 | 15.90 | 17.26 | 14.58 |
| Aspect              | 0.55           | 0.52 | 0.53 | 0.50 | 0.50 | 7.83             | 6.54  | 5.50  | 6.65  | 4.95  |
| Lithology           | 1.52           | 1.68 | 1.58 | 1.33 | 1.36 | 21.66            | 21.00 | 14.78 | 19.72 | 13.62 |
| Distance from fault | 0.94           | 1.05 | 0.85 | 1.23 | 1.27 | 13.42            | 13.18 | 13.67 | 10.64 | 12.71 |

|                     |      |      |      |      |      |       |       |       |       |       |
|---------------------|------|------|------|------|------|-------|-------|-------|-------|-------|
| Distance from road  | 0.99 | 0.88 | 0.89 | 0.80 | 0.86 | 14.07 | 11.04 | 8.84  | 11.15 | 8.58  |
| Distance from river | 0.82 | 0.77 | 0.75 | 0.75 | 0.81 | 11.66 | 9.58  | 8.36  | 9.40  | 8.11  |
| NDVI                |      | 1.26 |      | 1.14 | 1.24 |       | 15.72 | 12.65 |       | 12.36 |
| Rainfall            |      |      | 1.46 | 1.31 | 1.40 |       |       | 14.59 | 18.26 | 13.97 |
| Wind speed          |      |      |      |      | 0.52 |       |       |       |       | 5.20  |

**Table S4: Fitness results for structural equation model**

| Indicator Name | Indicator Value | Indicator Standard | Result   |
|----------------|-----------------|--------------------|----------|
| CMID/DF        | 2.79            | <3                 | Good fit |
| CFI            | 0.99            | >0.9               |          |
| GFI            | 1               | >0.8               |          |
| IFI            | 0.99            | >0.9               |          |
| TLI            | 0.99            | >0.9               |          |
| RMSEA          | 0.06            | <0.08              |          |
| SRMR           | 0.01            | <0.08              |          |

Note: CMIN ( $\chi^2$ ) = chi-square statistic for model fit. DF = Degrees of Freedom. CFI = Comparative Fit Index. GFI = Goodness of Fit Index. IFI = Incremental Fit Index. TLI = Tucker-Lewis Index. RMSEA = Root Mean Square Error of Approximation. SRMR = Standardized Root Mean Square Residual

**Table S5: Basic parameters of landslide region**

| Region                 | Longitudinal length (m) | Width (m) | Average width (m) | Average thickness (m) | Landslide area (m <sup>2</sup> ) | Landslide volume (m <sup>3</sup> ) |
|------------------------|-------------------------|-----------|-------------------|-----------------------|----------------------------------|------------------------------------|
| Unstable               | 76                      | 20–30     | 23                | 6                     | 2147                             | 1.3×10 <sup>4</sup>                |
| Scraping and shoveling | 96.4                    | 15–20     | 17                | 3                     | 2293                             | 0.7×10 <sup>4</sup>                |
| Accumulation           | 110.9                   | 30–50     | 38                | 6                     | 5234                             | 3.1×10 <sup>4</sup>                |

## **Supplementary Texts**

### **Text S1: Height, movement distance and area**

In landslide risk assessment, the ratio of height difference (H) to movement distance (L) is an important reference indicator (Goren et al., 2010; Manzella et al., 2008; Roback et al., 2018). A higher ratio signifies greater energy release during the landslide (Su et al., 2019). This also implies a larger scale and greater intensity of the landslide.

The International Union of Geological Sciences (IUGS) (Oberhänsli et al., 2017), defines a "rapid landslide" as one with an H/L ratio below 0.6, an average speed greater than 5 m/s, and a wide impact area. These landslides exhibit high intensity and destructive potential. When the H/L ratio exceeds 0.6, the landslide is classified as general or small-scale, with relatively lower speed, shorter travel distance, and reduced destructive potential. However, the potential hazards of such landslides cannot be entirely ruled out.

### **Text S2: Correlation analysis between influencing factors and the number of landslides**

Table S1 illustrates areas and the number of landslides within different threshold ranges of the influencing factors. The details are shown as below:

#### **(1) Topographic factors**

**Elevation:** When elevation is below 1000 m, the area is 55.61 km<sup>2</sup>, with 43 landslides occurring, resulting in the highest landslide density of 0.77 landslides/km<sup>2</sup>. As elevation increases, the number of landslides first rises and then falls, while

landslide density shows a continuous decline.

**Slope:** When the slope is between  $10^{\circ}$  and  $20^{\circ}$ , the landslide density reaches its peak at 0.52 landslides/km<sup>2</sup>, with 53 landslides occurring. Both the number of landslides and the density increase initially and then decrease.

**Aspect:** The southwest-facing zone has an area of 83.83 km<sup>2</sup>, and the highest landslide density of 0.6 landslides/km<sup>2</sup>, with 50 landslides.

## (2) Meteorological factors

**Rainfall:** the area is only 20.29 km<sup>2</sup>, but when rainfall exceeded 1400 mm, 44 landslides occurred, resulting in the highest landslide density of 2.17 landslides/km<sup>2</sup>.

**Wind Speed:** The area is 389.46 km<sup>2</sup>, with 17 landslides occurring and a maximum landslide density of 0.72 landslides/km<sup>2</sup> when wind speed was below 3 m/s. In the 2–3 m/s wind speed range, the highest number of landslides occurred, totaling 134. As wind speed increases, the number of landslides first rises and then falls, while landslide density shows a continuous decreasing trend.

## (3) Lithology

The lithology of the study area is: acidic plutonic, carbonate sedimentary, pyroclastic, mixed sedimentary, and intermediate volcanic rocks. Among these, mixed sedimentary covers the largest area at 315.17 km<sup>2</sup>, with 103 landslides occurring. Acidic sedimentary has the highest landslide density at 0.86 landslides/km<sup>2</sup> but covers the smallest area of 6.97 km<sup>2</sup>. When the distance to fault is less than 3 km, the area is 63.17 km<sup>2</sup>, with 44 landslides occurring and the highest landslide density of 0.7 landslides/km<sup>2</sup>. As the distance increases, the influence of fault activity diminishes, and

the overall trend of landslide density decreases.

#### **(4) Other factors**

**Distance to Road:** When the distance to roads is less than 200 m, the highest number of landslides occurs, totaling 30, with a landslide density of 0.37 landslides/km<sup>2</sup>.

**Distance to Rivers:** In the range of (1500, 2500] m, both the area (138.74 km<sup>2</sup>) and landslide density (0.41 landslides/km<sup>2</sup>) are at their maximum, with 57 landslides recorded.

**Normalized Difference Vegetation Index:** When NDVI is in the range of (0.6, 0.8], the area and the number of landslides reach their maximum at 319.13 km<sup>2</sup> and 124, respectively, with a landslide density of 0.39 landslides/km<sup>2</sup>. This indicates that the study area has relatively high vegetation coverage. When NDVI exceeds 0.8, landslide density peaks at 0.55 landslides/km<sup>2</sup>, with five landslides occurring. When NDVI is below 0.8, the number of landslides consistently increases with rising NDVI, matching the trend in area, and landslide density also continues to rise. This aligns with the observation mentioned earlier that areas with higher vegetation coverage tend to experience more frequent landslides.

#### **Supplementary Figures**

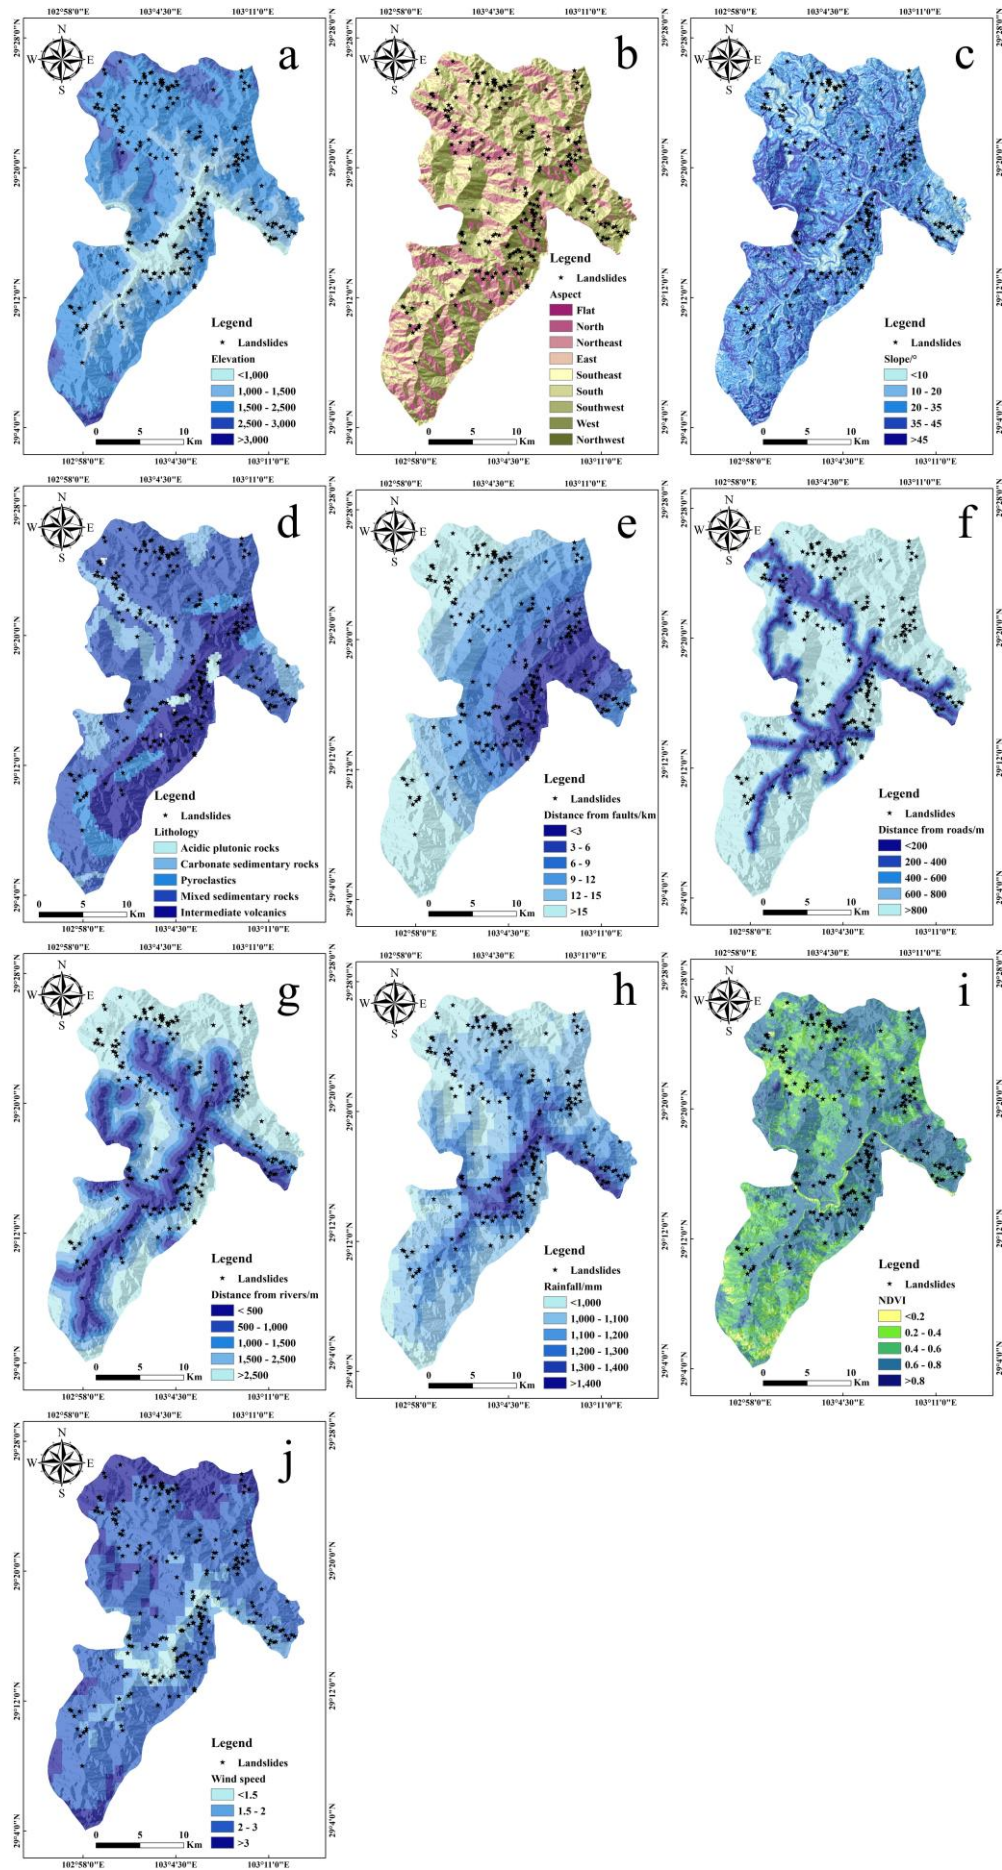



**Figure S1:** Thematic maps of landslide susceptibility influencing factors according to the classification criteria of the landslide susceptibility evaluation system (Table S1). The factors in figures a to j are successively Elevation, Aspect, Slope, PrC, Lithology, Distance from fault, Distance from road, Distance from river, Rainfall, NDVI, Wind speed.

## References

- Goren, L., Aharonov, E., & Anders, M. H. (2010). The long runout of the Heart Mountain landslide: Heating, pressurization, and carbonate decomposition. *Journal of Geophysical Research: Solid Earth*, 115(B10). <http://doi.org/10.1029/2009JB007113>
- Oberhänsli, R., Ogawa, Y., & Komac, M. (2017) *International Union of Geological Sciences (IUGS)—Sendai—Foreseeable but Unpredictable Geologic Events—IUGS Reactions*. Paper presented at the, Cham.
- Manzella, I., Labiouse, V., & Barla, G. (2008). Qualitative analysis of rock avalanches propagation by means of physical modelling of non-constrained gravel flows. *Rock Mechanics and Rock Engineering*, 41(1), 133-151. <http://doi.org/10.1007/s00603-007-0134-y>
- Roback, K., Clark, M. K., West, A. J., Zekkos, D., Li, G., Gallen, S. F., Chamlagain, D., & Godt, J. W. (2018). The size, distribution, and mobility of landslides caused by the 2015 Mw7.8 Gorkha earthquake, Nepal. *Geomorphology*, 301, 121-138. <http://doi.org/10.1016/j.geomorph.2017.01.030>
- Su, X., Wei, W., Ye, W., Meng, X., & Wu, W. (2019). Predicting landslide sliding distance based on energy dissipation and mass point kinematics. *Natural Hazards*, 96(3), 1367-1385. <http://doi.org/10.1007/s11069-019-03618-z>
